# Supplementary material for: Fabrication of BiVO 4 /Ag 2 CrO 4 heterojunction composites modified with graphene oxide for enhanced photoelectrochemical and photocatalytic performance
Source: Royal Society of Chemistry journal article supplement (doi:10.1039/d4ra07144a), 2024-01-01
Supplement: d4ra07144a1.pdf [file d4ra07144a1.pdf]

## Supplementary Information

Adewunmi Olufemi Oluwole<sup>a</sup>, Tunde L. Yusuf<sup>b</sup>, Shepherd M. Tichapondwa<sup>a</sup>, Michael O. Daramola<sup>a</sup>, Samuel A. Iwarere<sup>a\*</sup>

<sup>a</sup> Department of Chemical Engineering, Faculty of Engineering, Built Environment and Information Technology, University of Pretoria, Hatfield, Pretoria 0002, South Africa

<sup>b</sup> Department of Chemistry, Faculty of Natural and Agricultural Sciences, University of Pretoria, Hatfield, Pretoria 0002, South Africa

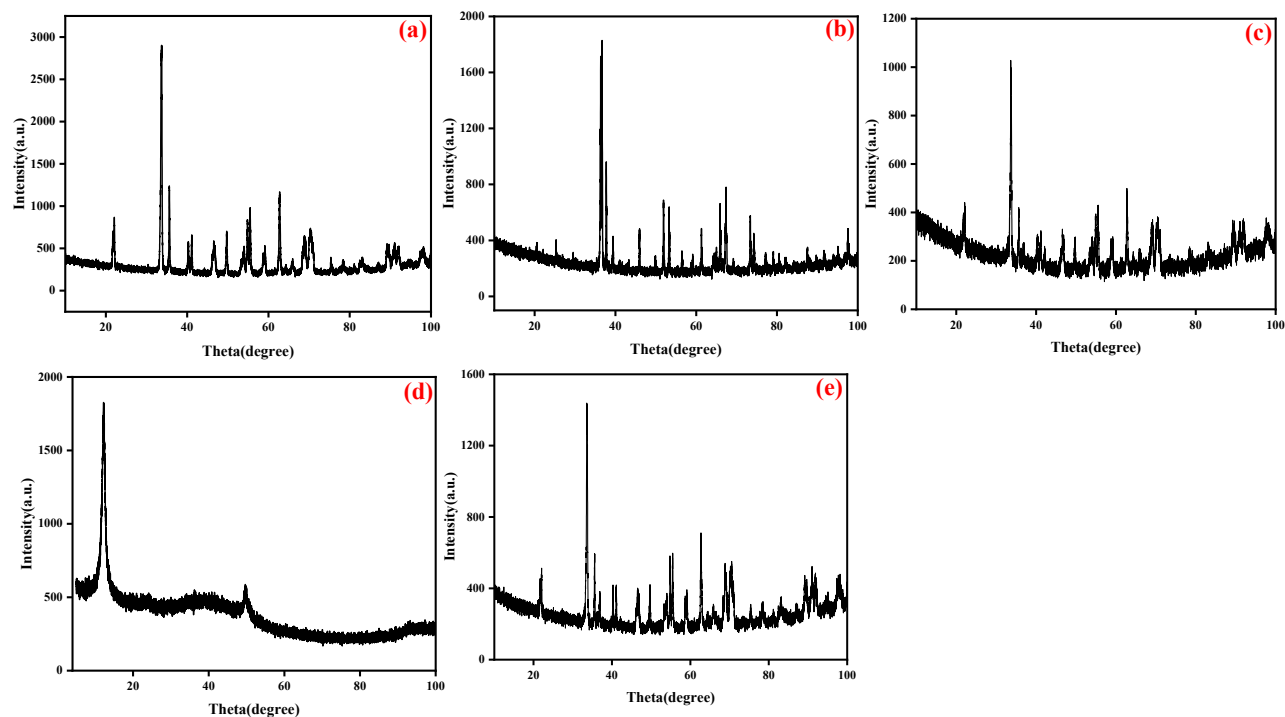

**Figure S1:** Expanded XRD plot for (a)  $\text{BiVO}_4$ , (b)  $\text{Ag}_2\text{CrO}_4$ , (c)  $\text{BiVO}_4/\text{Ag}_2\text{CrO}_4$ , (d) GO and (e)  $\text{GO}/\text{BiVO}_4/\text{Ag}_2\text{CrO}_4$ .

$$D = \frac{K\lambda}{\beta \cos\theta}$$

**S2**

D is the crystallite size in nm, K is Scherrer's constant  $\approx 0.9$ ,  $\lambda$  is the wavelength of the X-ray radiation (Co K $\alpha$ = 1.789 nm),  $\beta$  is the corrected band broadening (full width at half-maximum (FWHM)) of the diffraction peak, and  $\theta$  is the diffraction angle.

**Table S1:** Textural characteristics of the fabricated nanocomposites

| <b>Photocatalyst Material</b>                          | <b>Crystalline size (nm)</b> |
|--------------------------------------------------------|------------------------------|
| BiVO <sub>4</sub>                                      | 44.72                        |
| Ag <sub>2</sub> CrO <sub>4</sub>                       | 30.85                        |
| GO                                                     | 9.33                         |
| BiVO <sub>4</sub> /Ag <sub>2</sub> CrO <sub>4</sub>    | 32.68                        |
| GO/BiVO <sub>4</sub> /Ag <sub>2</sub> CrO <sub>4</sub> | 36.16                        |

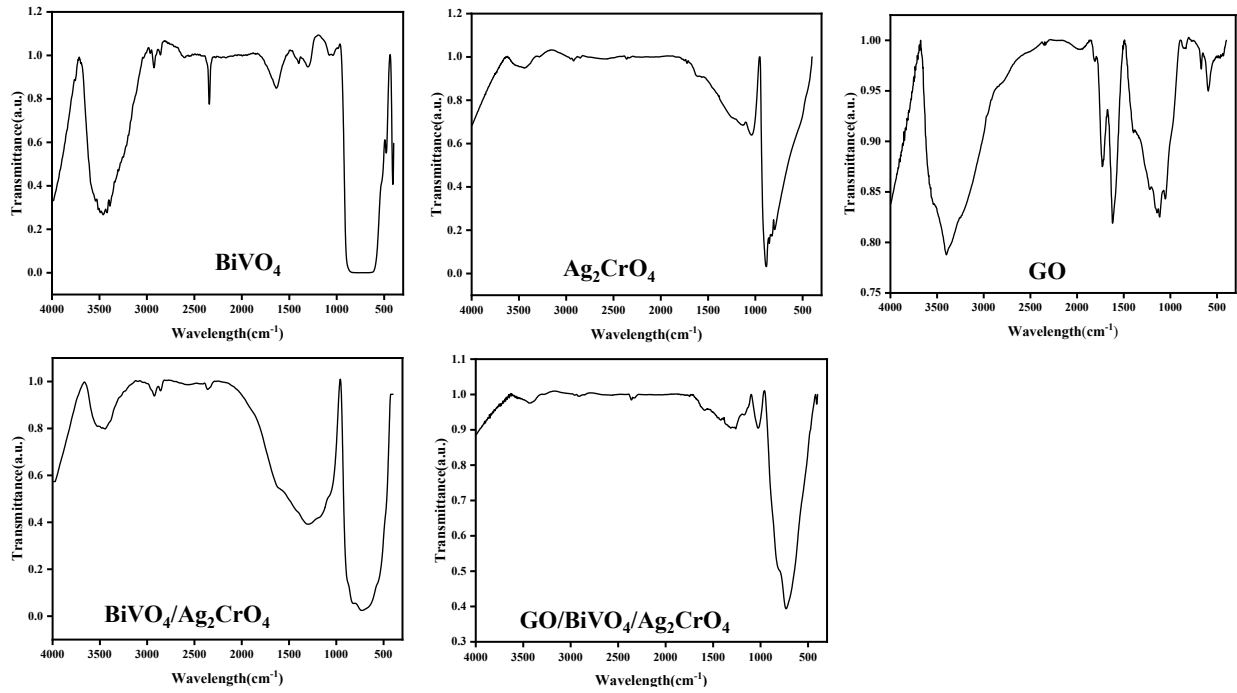

**Figure S2:** Expanded FTIR plot for the fabricated nanocomposites

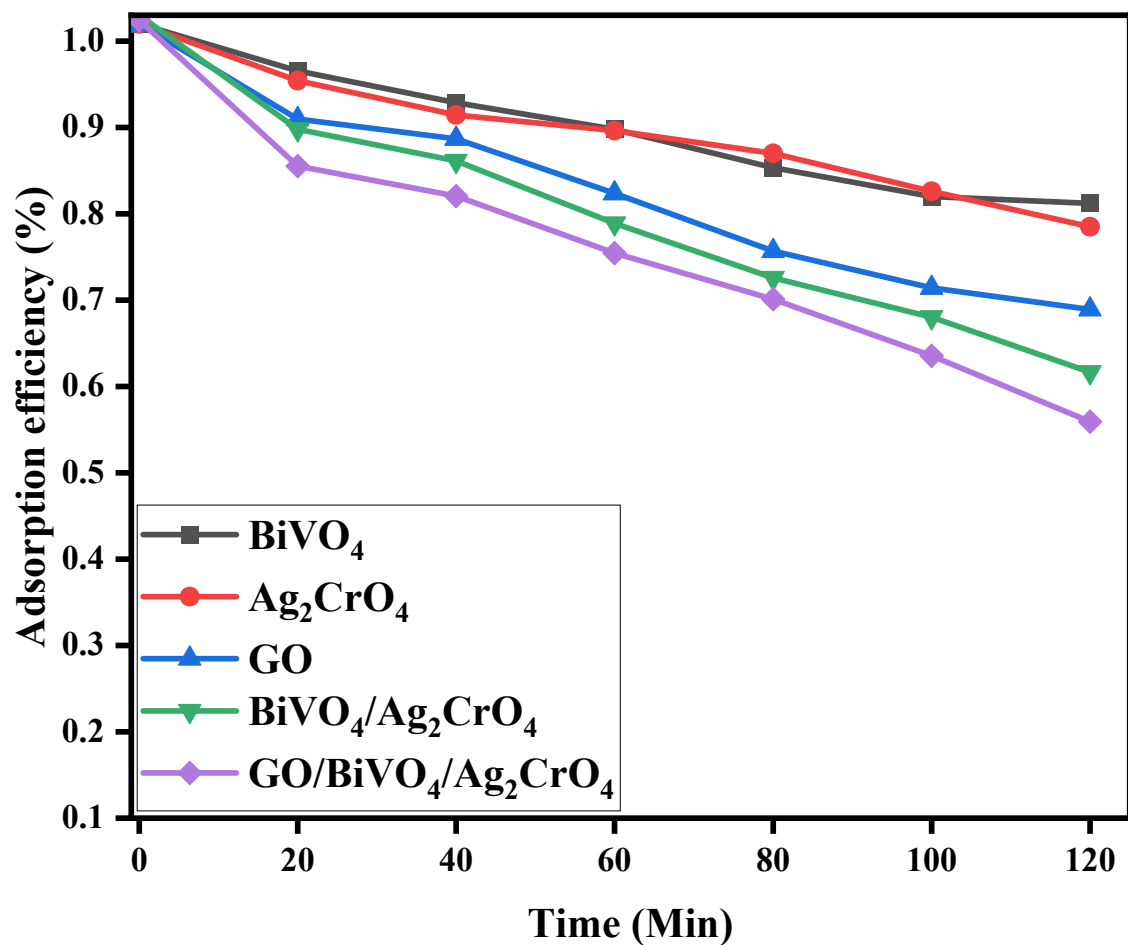

**Figure S3:** Adsorption performance of fabricated nanocomposites for the removal of ciprofloxacin

#### S4: Point of zero charge (pH<sub>ZPC</sub>) evaluation

The point of zero charge (pH<sub>ZPC</sub>) of the synthesized photocatalyst materials were evaluated using the pH drift method<sup>1</sup>. This was done by adjusting the pH of 20 mL 0.1 M KCl with 0.1 M of HCl and NaOH in the range 2, 4, 6, 8, 10, 12. An amount of 0.1 g of the fabricated GO/BiVO<sub>4</sub>/Ag<sub>2</sub>CrO<sub>4</sub> photocatalyst was added and shaken at room temperature for 24 h. The pH<sub>ZPC</sub> of the photocatalysts were obtained by subtracting the final pH of the aqueous solution from the initial pH while the point of intersection with the horizontal axis (initial pH) shows the PZC of value of the material<sup>2</sup>.

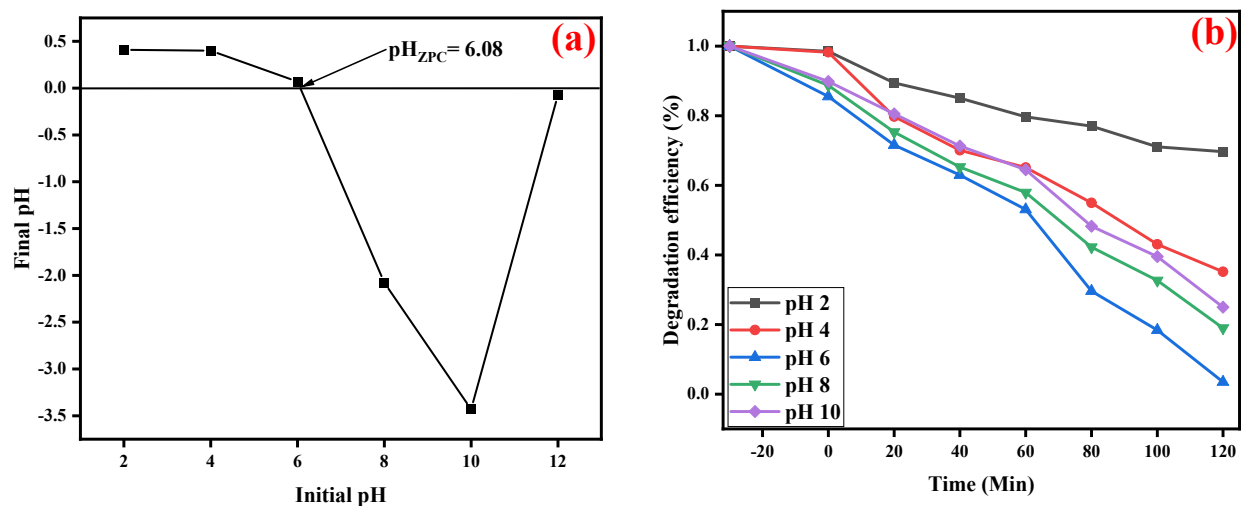

**Figure S4:** (a) Point of zero charge (pH<sub>ZPC</sub>) plot and (b) effect of pH plot of the fabricated GO/BiVO<sub>4</sub>/Ag<sub>2</sub>CrO<sub>4</sub> photocatalyst

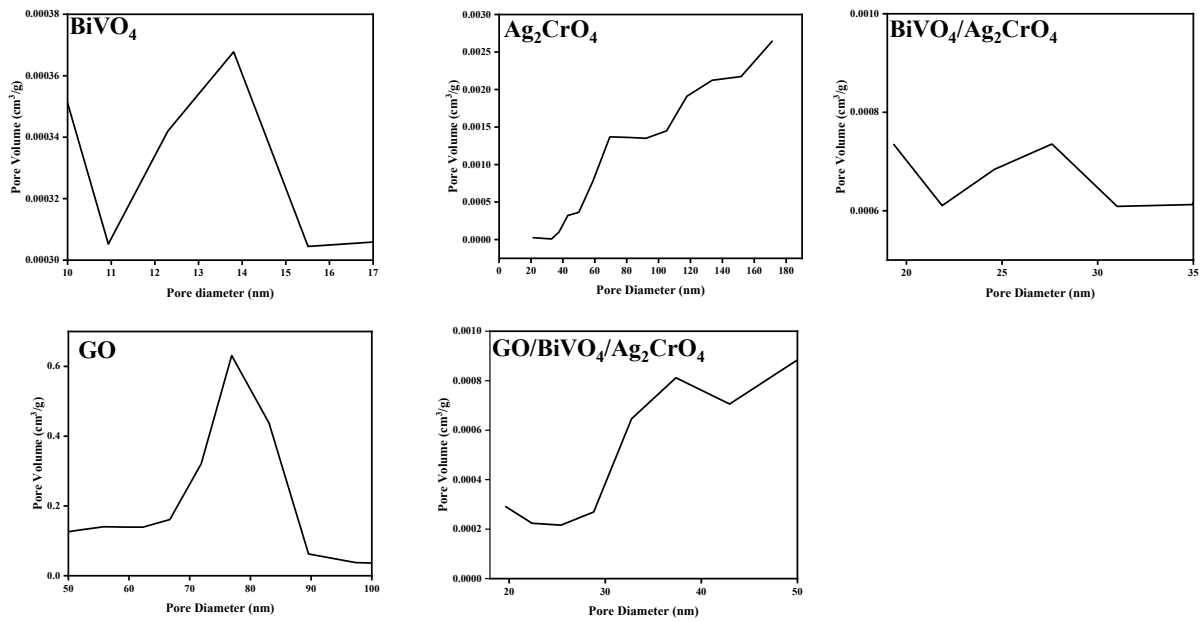

**Figure S5:** Pore volume and diameter distribution for the fabricated nanocomposites

**Table S2:** Comparison of ciprofloxacin degradation by various heterojunction photocatalysts

| Photocatalyst                                                        | Amount/mg/L | Photocatalytic efficiency (%) | Light source                        | Reference  |
|----------------------------------------------------------------------|-------------|-------------------------------|-------------------------------------|------------|
| ZnAl MMO/RGO <sub>20</sub>                                           | 10          | 90.58 in 2 h                  | 800 W xenon lamp                    | 3          |
| Ag/Ag <sub>2</sub> S/rGO                                             | 20          | 87.60 in 1 h                  | 300 W xenon lamp                    | 4          |
| N-TiO <sub>2</sub>                                                   | 10          | 54.50 in 3 h                  | 14 W blue LEDs lamp                 | 5          |
| P-g-C <sub>3</sub> N <sub>4</sub>                                    | 10          | 60.00 in 3 h                  | simulated solar irradiation         | 6          |
| WO <sub>3</sub> -CNDs                                                | 10          | 62.50 in 3 h                  | simulated solar irradiation         | 7          |
| g-C <sub>3</sub> N <sub>4</sub> /TiO <sub>2</sub> /kaolinite         | 10          | 92.00 in 4 h                  | xenon lamp (90 mW/cm <sup>2</sup> ) | 8          |
| NiAl LDH/Fe <sub>3</sub> O <sub>4</sub> -RGO                         | 10          | 91.00 in 3 h                  | 500 W xenon lamp                    | 3          |
| Fe <sub>3</sub> O <sub>4</sub> /TiO <sub>2</sub> /C-dot              | 20          | 90.00 in 3 h                  | Mercury vapor lamp                  | 9          |
| Bi <sub>3</sub> TaO <sub>7</sub> QDs/g-C <sub>3</sub> N <sub>4</sub> | 10          | 91.00 in 2 h                  | 86 W blue LED lamp                  | 10         |
| Ag/AgBr/BiVO <sub>4</sub>                                            | 10          | 91.00 in 2 h                  | 300 W xenon lamp                    | 11         |
| GO/BiVO <sub>4</sub> /Ag <sub>2</sub> CrO <sub>4</sub>               | 10          | 94.56 in 2 h                  | 200 W fluorescent lamps             | This study |

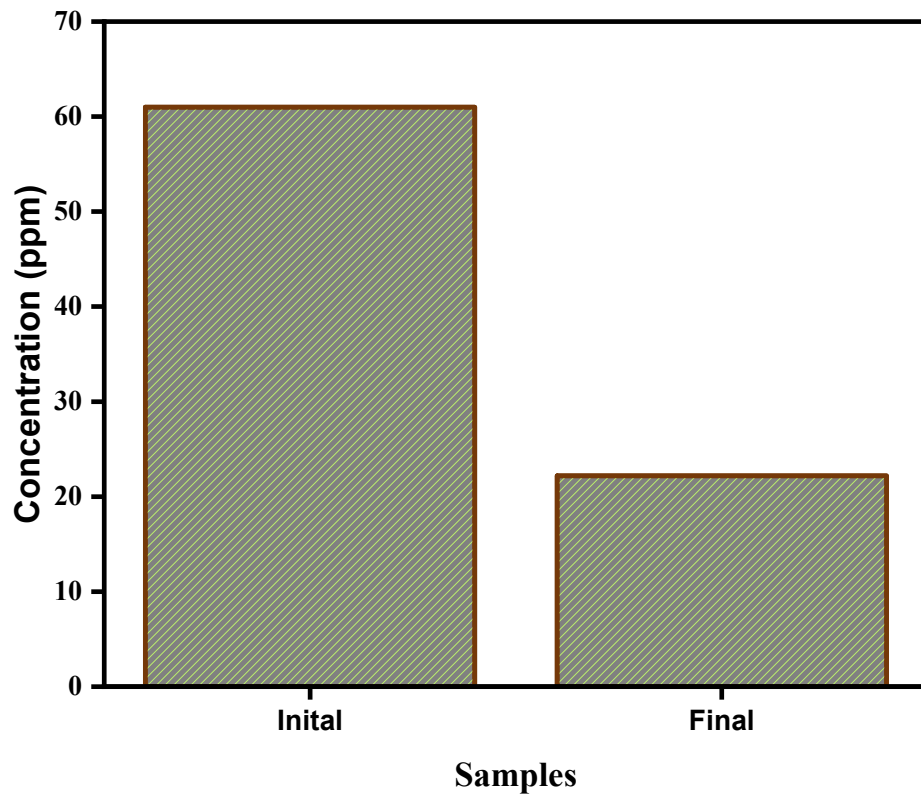

**Figure S6:** Total Organic Carbon test for CIP mineralization



## References

1. E. Cristiano, Y.-J. Hu, M. Sigfried, D. Kaplan and H. Nitsche, *Clays Clay Miner.*, 2011, **59**, 107-115.
2. O. Oyegbeda, S. O. Akpotu and B. Moodley, *J. Environ. Chem. Eng.*, 2024, 113447.
3. J. Ni, J. Xue, J. Shen, G. He and H. Chen, *Appl. Surf. Sci.*, 2018, **441**, 599-606.
4. P. Huo, C. Liu, D. Wu, J. Guan, J. Li, H. Wang, Q. Tang, X. Li, Y. Yan and S. Yuan, *Journal of industrial and engineering chemistry*, 2018, **57**, 125-133.
5. A. V. Karim and A. Shrivastav, *Chem. Eng. J.*, 2020, **392**, 124853.
6. R. Tsolele, O. Arotiba and S. Malinga, *International Journal of Environmental Science and Technology*, 2024, **21**, 7009-7023.
7. B. N. Zwane, N. Mabuba, B. O. Orimolade, B. A. Koiki and O. A. Arotiba, *Reaction Kinetics, Mechanisms and Catalysis*, 2020, **131**, 453-470.
8. C. Li, Z. Sun, W. Zhang, C. Yu and S. Zheng, *Appl. Catal., B*, 2018, **220**, 272-282.
9. R. K. Das, J. P. Kar and S. Mohapatra, *Ind. Eng. Chem. Res.*, 2016, **55**, 5902-5910.
10. X. Wang, A. Wang and J. Ma, *J. Hazard. Mater.*, 2017, **336**, 81-92.
11. F. Chen, Q. Yang, Y. Wang, F. Yao, Y. Ma, X. Huang, X. Li, D. Wang, G. Zeng and H. Yu, *Chem. Eng. J.*, 2018, **348**, 157-170.
